# Supplementary material for: First Trimester Maternal Homocysteine and Embryonic and Fetal Growth: The Rotterdam Periconception Cohort
Source: MDPI journal article supplement (doi:10.3390/nu14061129), 2022-03-08
Supplement: s1 [file s1]

**Table S1.** Comparison between cases of reference range homocysteine and hyperhomocysteinemia in the starting population.

| Characteristics                                              | tHcy < 15 µmol/L<br>(n= 2299)            | Hyperhomocysteinemia<br>> 15 µmol/L<br>(n= 13)             | P-value        |
|--------------------------------------------------------------|------------------------------------------|------------------------------------------------------------|----------------|
| Age <sup>a</sup> , mean ± SD                                 | 32.1± 4.6                                | 28.9 ± 6.0                                                 | 0.86           |
| Ethnicity, n (%)                                             |                                          |                                                            | 0.839          |
| Dutch                                                        | 1629 (81)                                | 9 (75)                                                     |                |
| Western, other                                               | 101 (5)                                  | 1 (8)                                                      |                |
| Non-western                                                  | 292 (14)                                 | 2 (2)                                                      |                |
| Education level, n (%)                                       |                                          |                                                            | <b>0.035</b>   |
| Low                                                          | 166 (8)                                  | 3 (25)                                                     |                |
| Intermediate                                                 | 714 (36)                                 | 6 (50)                                                     |                |
| High                                                         | 1122 (56)                                | 3 (25)                                                     |                |
| BMI <sup>b</sup> , median (IQR)                              | 25.2 (22.5-29.0)                         | 25.4 (22.9-31.7)                                           | 0.628          |
| Nulliparous, n (%)                                           | 729 (36)                                 | 3 (25)                                                     | 0.554          |
| Mode of conception, n (%)                                    |                                          |                                                            | 0.194          |
| Natural                                                      | 1599 (65)                                | 11 (85)                                                    |                |
| IVF/ICSI                                                     | 700 (30)                                 | 2 (15)                                                     |                |
| Alcohol use, n (%)                                           | 620 (31)                                 | 1 (8)                                                      | 0.119          |
| Smoking, n (%)                                               | 301 (15)                                 | 3 (25)                                                     | 0.407          |
| Folic acid supplement use, n (%)                             | 1962 (97)                                | 11 (92)                                                    | 0.269          |
| Caffeine use, n (%)                                          |                                          |                                                            | 0.324          |
| None                                                         | 908 (45)                                 | 8 (67)                                                     |                |
| Moderate                                                     | 816 (40)                                 | 3 (25)                                                     |                |
| High                                                         | 292 (14)                                 | 1 (8)                                                      |                |
| <b>Biomarkers*</b>                                           | <b>tHcy &lt; 15 µmol/L<br/>(n= 2299)</b> | <b>Hyperhomocysteinemia<br/>&gt; 15 µmol/L<br/>(n= 13)</b> | <b>P-value</b> |
| Serum folate <sup>c</sup> , median (IQR)                     | 37.2 (28.5-43.5)                         | 11.5 (10.5-45.15)                                          | <b>0.025</b>   |
| Vitamin B <sub>12</sub> <sup>d</sup> , median (IQR)          | 297.0 (226-375)                          | 207.0 (175-327)                                            | 0.242          |
| Paternal tHcy <sup>e</sup> , median (IQR)                    | 11.5 (9.9-13.7)                          | 12.45 (11.53-13.8)                                         | 0.409          |
| Paternal serum folate <sup>c</sup> , median (IQR)            | 17.7 (14-22.4)                           | 17.45 (13.63-25.4)                                         | 0.914          |
| Paternal vitamin B <sub>12</sub> <sup>d</sup> , median (IQR) | 340 (268-424.5)                          | 475.0 (325.75-743.5)                                       | 0.064          |

<sup>a</sup> years, <sup>b</sup> kg/m<sup>2</sup>, <sup>c</sup> nmol/L, <sup>d</sup> pmol/l, <sup>e</sup> µmol/L. \* Subgroup from November 2010 to December 2016. Data on alcohol use, smoking, folic acid supplementation and caffeine use were collected during the periconception period. Parametric data is represented as mean ± SD, whereas non-parametric data is represented as median (IQR). Abbreviations: BMI, body mass index; IUI, intrauterine insemination; IVF, in vitro fertilization; ICSI, intracytoplasmic sperm injection; SD, standard deviation; IQR, interquartile range. P-value <0.05 represented in bold.

**Table S2.** Maternal baseline characteristics of the included and excluded population.

| Characteristics                                              | Included population<br>(n = 1060)        | Missing values,<br>n (%)         | Excluded population<br>(n = 1252)         | Missing values,<br>n (%)         | P-value        |
|--------------------------------------------------------------|------------------------------------------|----------------------------------|-------------------------------------------|----------------------------------|----------------|
| Age <sup>a</sup> , mean ± SD                                 | 32.4 ± 4.4                               | 0 (0)                            | 31.8 ± 4.8                                | 0 (0)                            | <b>0.001</b>   |
| Ethnicity, n (%)                                             |                                          | 48 (5)                           |                                           | 230 (18)                         | 0.273          |
| Dutch                                                        | 814 (80)                                 |                                  | 824 (81)                                  |                                  |                |
| Western, other                                               | 58 (6)                                   |                                  | 44 (4)                                    |                                  |                |
| Non-western                                                  | 140 (14)                                 |                                  | 154 (15)                                  |                                  |                |
| Education level, n (%)                                       |                                          | 53 (5)                           |                                           | 245 (20)                         | <b>0.048</b>   |
| Low                                                          | 71 (7)                                   |                                  | 98 (10)                                   |                                  |                |
| Intermediate                                                 | 353 (35)                                 |                                  | 367 (36)                                  |                                  |                |
| High                                                         | 583 (58)                                 |                                  | 542 (54)                                  |                                  |                |
| BMI <sup>b</sup> , median (IQR)                              | 24.5 (22.1-27.9)                         | 28 (3)                           | 25.8 (22.9-29.7)                          | 45 (4)                           | <b>0.000</b>   |
| Nulliparous, n (%)                                           | 380 (37)                                 | 45 (4)                           | 352 (35)                                  | 237 (19)                         | 0.212          |
| Mode of conception, n (%)                                    |                                          | 0 (0)                            |                                           | 0 (0)                            | <b>0.000</b>   |
| Natural                                                      | 555 (52)                                 |                                  | 1055 (84)                                 |                                  |                |
| IVF/ICSI                                                     | 505 (48)                                 |                                  | 197 (16)                                  |                                  |                |
| Alcohol use, n (%)                                           | 307 (30)                                 | 49 (5)                           | 314 (31)                                  | 253 (20)                         | 0.629          |
| Smoking, n (%)                                               | 143 (14)                                 | 47 (5)                           | 161 (16)                                  | 254 (20)                         | 0.214          |
| Folic acid supplement use, n (%)                             | 1004 (99)                                | 46 (4)                           | 969 (96)                                  | 241 (19)                         | <b>0.000</b>   |
| Caffeine use, n (%)                                          |                                          | 45 (4)                           |                                           | 239 (19)                         | 0.563          |
| None                                                         | 456 (45)                                 |                                  | 460 (45)                                  |                                  |                |
| Moderate                                                     | 404 (40)                                 |                                  | 415 (41)                                  |                                  |                |
| High                                                         | 155 (15)                                 |                                  | 138 (14)                                  |                                  |                |
| tHcy <sup>e</sup> , mean ± SD                                | 6.4 ± 1.6                                | 0 (0)                            | 6.5 ± 2.7                                 | 0 (0)                            | 0.433          |
| <b>Biomarkers*</b>                                           | <b>Included population<br/>(n = 682)</b> | <b>Missing values, n<br/>(%)</b> | <b>Excluded population<br/>(n = 1061)</b> | <b>Missing values,<br/>n (%)</b> | <b>P-value</b> |
| tHcy <sup>e</sup> , median (IQR)                             | 6.1 (5.3-7.1)                            | 0 (0)                            | 5.9 (5.0-7.2)                             | 0 (0)                            | 0.208          |
| Serum folate <sup>c</sup> , median (IQR)                     | 39.7 (33.2-45.4)                         | 27 (4)                           | 35.2 (24.1-42.3)                          | 54 (5)                           | <b>0.000</b>   |
| Vitamin B <sub>12</sub> <sup>d</sup> , median (IQR)          | 316.0 (246.0-402.0)                      | 7 (1)                            | 281.0 (215.0-359.0)                       | 16 (2)                           | <b>0.000</b>   |
| Paternal tHcy <sup>e</sup> , median (IQR)                    | 11.6 (9.9-13.6)                          | 132 (19)                         | 11.2 (9.8-13.3)                           | 256 (24)                         | 0.128          |
| Paternal serum folate <sup>c</sup> , median (IQR)            | 18.1 (14.4-22.6)                         | 133 (20)                         | 17.5 (13.7-22.2)                          | 257 (24)                         | 0.267          |
| Paternal vitamin B <sub>12</sub> <sup>d</sup> , median (IQR) | 337.0 (265.0-416.5)                      | 133 (20)                         | 341.5 (271.0-432.5)                       | 251 (24)                         | 0.130          |

<sup>a</sup>years, <sup>b</sup>kg/m<sup>2</sup>, <sup>c</sup>nmol/L, <sup>d</sup>pmol/l, <sup>e</sup>μmol/L. \* Subgroup from November 2010 to December 2016. Alcohol use, smoking, folic acid supplementation and caffeine use were measured during the periconception period. Parametric data is represented as mean ± SD, whereas non-parametric data is represented as median (IQR). Abbreviations: BMI, body mass index; IUI, intrauterine insemination; IVF, in vitro fertilization; ICSI, intracytoplasmic sperm injection; SD, standard deviation; IQR, interquartile range. P-value <0.05 represented in bold.

**Table S3.** Association between maternal homocysteine, CRL and EV at 7, 9 and 11 weeks of gestation.

|                                              |        | Model 1                            |         | Model 2                            |         |
|----------------------------------------------|--------|------------------------------------|---------|------------------------------------|---------|
| Included population                          |        |                                    |         |                                    |         |
|                                              |        | CRL                                |         |                                    |         |
|                                              |        | Beta (95%CI) $\sqrt{\text{mm}}$    | P-value | Beta (95%CI) $\sqrt{\text{mm}}$    | P-value |
| 7 weeks                                      | n= 502 | -0.029 (-0.047,-0.011)             | 0.002   | -0.025 (-0.046,-0.005)             | 0.016   |
| 9 weeks                                      | n= 778 | -0.019 (-0.032,-0.006)             | 0.005   | -0.021 (-0.035,-0.007)             | 0.003   |
| 11 weeks                                     | n= 830 | -0.028 (-0.044,-0.013)             | <0.001  | -0.013 (-0.022,-0.004)             | 0.006   |
|                                              |        | EV                                 |         |                                    |         |
|                                              |        | Beta (95%CI) $\sqrt[3]{\text{cm}}$ | P-value | Beta (95%CI) $\sqrt[3]{\text{cm}}$ | P-value |
| 7 weeks                                      | n= 475 | -0.011 (-0.019,-0.003)             | 0.006   | -0.010 (-0.019,-0.001)             | 0.024   |
| 9 weeks                                      | n= 740 | -0.009 (-0.015,-0.002)             | 0.007   | -0.009 (-0.015,-0.002)             | 0.010   |
| 11 weeks                                     | n= 722 | -0.013 (-0.022,-0.004)             | 0.006   | -0.010 (-0.020,-0.001)             | 0.035   |
| Natural pregnancies                          |        |                                    |         |                                    |         |
|                                              |        | CRL                                |         |                                    |         |
|                                              |        | Beta (95%CI) $\sqrt{\text{mm}}$    | P-value | Beta (95%CI) $\sqrt{\text{mm}}$    | P-value |
| 7 weeks                                      | n= 234 | -0.038 (-0.070,-0.006)             | 0.022   | -0.032 (-0.069,0.005)              | 0.089   |
| 9 weeks                                      | n= 370 | -0.018 (-0.039,0.003)              | 0.091   | -0.023 (-0.046,-0.001)             | 0.041   |
| 11 weeks                                     | n= 426 | -0.021 (-0.045,0.003)              | 0.085   | -0.017 (-0.044,0.009)              | 0.204   |
|                                              |        | EV                                 |         |                                    |         |
|                                              |        | Beta (95%CI) $\sqrt[3]{\text{cm}}$ | P-value | Beta (95%CI) $\sqrt[3]{\text{cm}}$ | P-value |
| 7 weeks                                      | n= 219 | -0.017 (-0.030,-0.004)             | 0.011   | -0.015 (-0.030,0.000)              | 0.054   |
| 9 weeks                                      | n= 348 | -0.010 (-0.020,0.000)              | 0.047   | -0.012 (-0.022,-0.001)             | 0.029   |
| 11 weeks                                     | n= 377 | -0.010 (-0.023,0.004)              | 0.178   | -0.005 (-0.020,0.009)              | 0.468   |
| IVF/ICSI pregnancies, frozen embryo transfer |        |                                    |         |                                    |         |
|                                              |        | CRL                                |         |                                    |         |
|                                              |        | Beta (95%CI) $\sqrt{\text{mm}}$    | P-value | Beta (95%CI) $\sqrt{\text{mm}}$    | P-value |
| 7 weeks                                      | n= 84  | -0.039 (-0.079,0.002)              | 0.061   | -0.042 (-0.085,0.000)              | 0.049   |
| 9 weeks                                      | n= 135 | -0.035 (-0.068,-0.002)             | 0.035   | -0.038 (-0.073,-0.002)             | 0.038   |
| 11 weeks                                     | n= 125 | -0.041 (-0.075,-0.008)             | 0.017   | -0.047 (-0.083,-0.010)             | 0.014   |
|                                              |        | EV                                 |         |                                    |         |
|                                              |        | Beta (95%CI) $\sqrt[3]{\text{cm}}$ | P-value | Beta (95%CI) $\sqrt[3]{\text{cm}}$ | P-value |
| 7 weeks                                      | n= 84  | -0.015 (-0.039,0.008)              | 0.194   | -0.017 (-0.044,0.009)              | 0.190   |
| 9 weeks                                      | n= 130 | -0.016 (-0.032,0.000)              | 0.047   | -0.018 (-0.035,-0.001)             | 0.035   |
| 11 weeks                                     | n= 110 | -0.026 (-0.047,-0.004)             | 0.018   | -0.022 (-0.045,0.001)              | 0.060   |
| IVF/ICSI pregnancies, fresh embryo transfer  |        |                                    |         |                                    |         |

|          |        | <b>CRL</b>                         |              |                                    |              |
|----------|--------|------------------------------------|--------------|------------------------------------|--------------|
|          |        | Beta (95%CI) $\sqrt{\text{mm}}$    | P-value      | Beta (95%CI) $\sqrt{\text{mm}}$    | P-value      |
| 7 weeks  | n= 184 | -0.11 (-0.031,0.008)               | 0.253        | -0.009 (-0.032,0.013)              | 0.400        |
| 9 weeks  | n= 273 | -0.013 (-0.031,0.005)              | 0.163        | -0.009 (-0.029,0.011)              | 0.364        |
| 11 weeks | n= 279 | <b>-0.031 (-0.050,-0.014)</b>      | <b>0.001</b> | <b>-0.033 (-0.052,-0.013)</b>      | <b>0.001</b> |
|          |        | <b>EV</b>                          |              |                                    |              |
|          |        | Beta (95%CI) $\sqrt[3]{\text{cm}}$ | P-value      | Beta (95%CI) $\sqrt[3]{\text{cm}}$ | P-value      |
| 7 weeks  | n= 172 | 0.001 (-0.007,0.008)               | 0.846        | 0.001 (-0.008,0.009)               | 0.886        |
| 9 weeks  | n= 262 | 0.000 (-0.008,0.008)               | 0.937        | 0.001 (-0.008,0.009)               | 0.906        |
| 11 weeks | n= 235 | <b>-0.012 (-0.023,0.000)</b>       | <b>0.048</b> | -0.010 (-0.022,0.001)              | 0.081        |

CRL= crown-rump length, EV= embryonic volume. Model 1: adjusted for GA, Model 2: adjusted for GA, conception mode (included population only), parity, smoking, folic acid supplement use, alcohol, BMI, age and fetal sex. N number was too small to analyze CRL and EV at 13 weeks of gestation. P-value <0.05 represented in bold.

**Table S4.** Association between maternal homocysteine and longitudinal first trimester embryonic head measurements in the included population (n= 118), natural pregnancies (n= 71) and IVF/ICSI pregnancies (n= 47).

|                            | <i>Model 1</i>               |         | <i>Model 2</i>               |         |
|----------------------------|------------------------------|---------|------------------------------|---------|
|                            | <b>BPD</b>                   |         |                              |         |
|                            | Beta (95%CI) mm              | P-value | Beta (95%CI) mm              | P-value |
| Included population n= 104 | 0.080 (-0.314, 0.154)        | 0.496   | -0.079 (-0.321, 0.163)       | 0.518   |
| Natural pregnancies n= 65  | -0.153 (-0.482, 0.176)       | 0.355   | -0.142 (-0.471, 0.187)       | 0.389   |
| IVF/ICSI pregnancies n= 39 | 0.023 (-0.257, 0.303)        | 0.866   | -0.072 (-0.401, 0.256)       | 0.653   |
|                            | <b>OFD</b>                   |         |                              |         |
|                            | Beta (95%CI) mm              | P-value | Beta (95%CI) mm              | P-value |
| Included population n= 104 | -0.083 (-0.328, 0.161)       | 0.500   | -0.029 (-0.279, 0.219)       | 0.812   |
| Natural pregnancies n= 65  | -0.144 (-0.482, 0.193)       | 0.394   | -0.079 (-0.400, 0.241)       | 0.621   |
| IVF/ICSI pregnancies n= 39 | -0.046 (-0.371, 0.278)       | 0.774   | -0.117 (-0.497, 0.263)       | 0.531   |
|                            | <b>HV</b>                    |         |                              |         |
|                            | Beta (95%CI) cm <sup>3</sup> | P-value | Beta (95%CI) cm <sup>3</sup> | P-value |
| Included population n= 104 | -0.017 (-0.172, 0.136)       | 0.818   | -0.010 (-0.167, 0.146)       | 0.898   |
| Natural pregnancies n= 65  | -0.08 (-0.306, 0.141)        | 0.464   | -0.071 (-0.289, 0.148)       | 0.521   |
| IVF/ICSI pregnancies n= 39 | 0.039 (-0.102, 0.181)        | 0.575   | 0.003 (-0.156, 0.163)        | 0.966   |
|                            | <b>HC</b>                    |         |                              |         |
|                            | Beta (95%CI) mm              | P-value | Beta (95%CI) mm              | P-value |
| Included population n= 104 | -0.251 (-0.969, 0.467)       | 0.488   | -0.159 (-0.897, 0.578)       | 0.667   |
| Natural pregnancies n= 65  | -0.464 (-1.469, 0.540)       | 0.357   | 0.340 (-1.319, 0.641)        | 0.489   |
| IVF/ICSI pregnancies n= 39 | -0.050 (-0.927, 0.825)       | 0.906   | -0.312 (-1.335, 0.709)       | 0.533   |
|                            | <b>TCD</b>                   |         |                              |         |
|                            | Beta (95%CI) mm              | P-value | Beta (95%CI) mm              | P-value |
| Included population n= 81  | -0.027 (-0.129, 0.074)       | 0.589   | -0.002 (-0.111, 0.108)       | 0.974   |
| Natural pregnancies n= 48  | -0.128 (-0.293, 0.035)       | 0.121   | -0.047 (-0.219, 0.125)       | 0.581   |
| IVF/ICSI pregnancies n= 33 | 0.030 (-0.079, 0.139)        | 0.575   | 0.001 (-0.116, 0.118)        | 0.983   |

BPD= biparietal diameter, HC= head circumference, HV= head volume, OFD= occipitofrontal diameter, TCD= transcerebellar diameter. Model 1: adjusted for GA, Model 2: adjusted for conception mode (included population only), parity, smoking, folic acid supplement use, alcohol, BMI, age, fetal sex. P-value <0.05 represented in bold.

**Table S5.** Association between maternal homocysteine and longitudinal second and third trimester fetal growth in the included population (n= 269), natural pregnancies (n= 145) and IVF/ICSI pregnancies (n= 124).

|                             | Model 1                        |              | Model 2                        |              |
|-----------------------------|--------------------------------|--------------|--------------------------------|--------------|
|                             | BPD                            |              |                                |              |
|                             | Beta (95%CI) mm                | P-value      | Beta (95%CI) mm                | P-value      |
| Included population n= 243  | 0.136 (-0.094, 0.367)          | 0.246        | 0.088 (-0.144, 0.321)          | 0.454        |
| Natural pregnancies n= 134  | 0.188 (-0.774, 0.454)          | 0.162        | 0.154 (-0.115, 0.422)          | 0.257        |
| IVF/ICSI pregnancies n= 109 | 0.035 (-0.399, 0.470)          | 0.872        | -0.060 (-0.487, 0.366)         | 0.779        |
|                             | HC                             |              |                                |              |
|                             | Beta (95%CI) mm                | P-value      | Beta (95%CI) mm                | P-value      |
| Included population n= 243  | 0.341 (-0.186, 0.868)          | 0.204        | 0.248 (-0.303, 0.799)          | 0.375        |
| Natural pregnancies n= 134  | 0.333 (-0.314, 0.980)          | 0.309        | 0.283 (-0.374, 0.938)          | 0.393        |
| IVF/ICSI pregnancies n= 109 | 0.205 (-0.817, 1.227)          | 0.691        | 0.178 (-0.802, 1.158)          | 0.719        |
|                             | TCD                            |              |                                |              |
|                             | Beta (95%CI) mm                | P-value      | Beta (95%CI) mm                | P-value      |
| Included population n= 207  | 0.011 (-0.088, 0.110)          | 0.832        | 0.002 (-0.098, 0.104)          | 0.962        |
| Natural pregnancies n= 119  | -0.014 (-0.123, 0.094)         | 0.796        | -0.022 (-0.131, 0.087)         | 0.688        |
| IVF/ICSI pregnancies n= 88  | 0.052 (-0.137, 0.241)          | 0.586        | 0.025 (-0.168, 0.218)          | 0.797        |
|                             | AC                             |              |                                |              |
|                             | Beta (95%CI) mm                | P-value      | Beta (95%CI) mm                | P-value      |
| Included population n= 243  | 0.195 (-0.577, 0.967)          | 0.619        | 0.126 (-0.657, 0.909)          | 0.751        |
| Natural pregnancies n= 134  | 0.405 (-0.561, 1.372)          | 0.408        | 0.394 (-0.591, 1.381)          | 0.429        |
| IVF/ICSI pregnancies n= 109 | -0.238 (-1.555, 1.077)         | 0.719        | -0.477 (-1.811, 0.856)         | 0.478        |
|                             | FL                             |              |                                |              |
|                             | Beta (95%CI) mm                | P-value      | Beta (95%CI) mm                | P-value      |
| Included population n= 243  | -0.046 (-0.201, 0.108)         | 0.554        | -0.093 (-0.250, 0.064)         | 0.225        |
| Natural pregnancies n= 134  | 0.092 (-0.101, 0.285)          | 0.345        | 0.047 (-0.151, 0.246)          | 0.635        |
| IVF/ICSI pregnancies n= 109 | <b>-0.336 (-0.590, -0.083)</b> | <b>0.009</b> | <b>-0.380 (-0.625, -0.134)</b> | <b>0.003</b> |
|                             | EFW                            |              |                                |              |
|                             | Beta (95%CI) g                 | P-value      | Beta (95%CI) g                 | P-value      |
| Included population n= 244  | 1.104 (-8.819, 11.027)         | 0.826        | -0.567 (-10.685, 9.550)        | 0.912        |
| Natural pregnancies n= 135  | 6.041 (-6.615, 18.697)         | 0.346        | 5.051 (-7.902, 18.003)         | 0.448        |
| IVF/ICSI pregnancies n= 109 | -8.819 (-25.251, 7.611)        | 0.288        | -12.256 (-28.902, 4.389)       | 0.145        |

AC= abdominal circumference, BPD= biparietal diameter, EFW= estimated fetal weight, FL= femur length, HC= head circumference; TCD= transcerebellar diameter. Model 1: adjusted for GA, Model 2: adjusted for GA, conception mode (included population only), parity, smoking, folic acid supplement use, alcohol, BMI, age, fetal sex. P-value <0.05 represented in bold.

**Table S6.** Association between maternal homocysteine and neonatal birth weight in the included population (n= 1060), natural pregnancies (n= 555) and IVF/ICSI pregnancies (n= 505).

|                             | Model 1                   |         | Model 2                       |              |
|-----------------------------|---------------------------|---------|-------------------------------|--------------|
|                             | Birth weight              |         |                               |              |
|                             | Beta (95%CI) g            | P-value | Beta (95%CI) g                | P-value      |
| Included population n= 983  | -0.486 (-18.124, 17.152)  | 0.957   | -1.857 (-20.121, 16.407)      | 0.842        |
| Natural pregnancies n= 529  | -11.757 (-33.945, 10.431) | 0.298   | -21.322 (-44.846, 2.201)      | 0.076        |
| IVF/ICSI pregnancies n= 454 | 16.878 (-12.193, 45.949)  | 0.254   | 24.989 (-4.317, 54.282)       | 0.094        |
|                             | SGA                       |         |                               |              |
|                             | OR (95%CI)                | P-value | OR (95%CI)                    | P-value      |
| Included population n= 976  | 0.989 (0.882, 1.109)      | 0.850   | 0.968 (0.857, 1.093)          | 0.600        |
| Natural pregnancies n= 525  | 1.029 (0.894, 1.184)      | 0.689   | 1.011 (0.868, 1.178)          | 0.886        |
| IVF/ICSI pregnancies n= 451 | 0.917 (0.754, 1.116)      | 0.388   | 0.901 (0.732, 1.110)          | 0.329        |
|                             | LGA                       |         |                               |              |
|                             | OR (95%CI)                | P-value | OR (95%CI)                    | P-value      |
| Included population n= 976  | 0.985 (0.860, 1.128)      | 0.826   | 0.950 (0.816, 1.105)          | 0.504        |
| Natural pregnancies n= 525  | 0.976 (0.828, 1.150)      | 0.772   | 0.919 (0.757, 1.115)          | 0.391        |
| IVF/ICSI pregnancies n= 451 | 0.984 (0.774, 1.250)      | 0.893   | 1.020 (0.796, 1.308)          | 0.875        |
|                             | Hoftiezer percentiles     |         |                               |              |
|                             | Beta (95%CI)              | P-value | Beta (95%CI)                  | P-value      |
| Included population n= 976  | -0.002 (-0.013, 0.010)    | 0.770   | -0.003 (-0.016, 0.009)        | 0.587        |
| Natural pregnancies n= 525  | -0.010 (-0.025, 0.005)    | 0.174   | <b>-0.017 (-0.033, 0.000)</b> | <b>0.046</b> |
| IVF/ICSI pregnancies n= 451 | 0.012 (-0.007, 0.030)     | 0.224   | 0.015 (-0.004, 0.034)         | 0.131        |

SGA= small-for-gestational age, LGA=large-for-gestational age. Model 1: adjusted for GA (not applied for hoftiezer percentiles), Model 2: adjusted for GA, conception mode (included population only), parity, smoking, folic acid supplement use, alcohol, BMI, age, fetal sex. P-value <0.05 represented in bold.

**Table S7.** Association between quartiles of homocysteine and Hoftiezer percentiles in the included population (n= 983), natural pregnancies (n= 529) and IVF/ICSI pregnancies (n= 454).

|        |                      | Model 1               |         | Model 2                       |              |
|--------|----------------------|-----------------------|---------|-------------------------------|--------------|
|        | Included population  |                       |         |                               |              |
|        |                      | Beta (95%CI)          | P-value | Beta (95%CI)                  | P-value      |
| n= 229 | Q1                   | Reference             |         | Reference                     |              |
| n= 233 | Q2                   | -0.038 (-0.091,0.015) | 0.159   | -0.042 (-0.097,0.014)         | 0.140        |
| n= 297 | Q3                   | -0.010 (-0.035,0.016) | 0.455   | -0.013 (-0.039,0.013)         | 0.329        |
| n= 224 | Q4                   | -0.006 (-0.024,0.012) | 0.507   | -0.010 (-0.029,0.009)         | 0.310        |
|        | Natural pregnancies  |                       |         |                               |              |
|        |                      | Beta (95%CI)          | P-value | Beta (95%CI)                  | P-value      |
| n= 127 | Q1                   | Reference             |         | Reference                     |              |
| n= 111 | Q2                   | -0.019 (-0.095,0.056) | 0.617   | -0.053 (-0.131,0.025)         | 0.184        |
| n= 155 | Q3                   | -0.021 (-0.056,0.014) | 0.229   | -0.036 (-0.073,0.000)         | 0.051        |
| n= 136 | Q4                   | -0.019 (-0.043,0.005) | 0.116   | <b>-0.031 (-0.057,-0.005)</b> | <b>0.018</b> |
|        | IVF/ICSI pregnancies |                       |         |                               |              |
|        |                      | Beta (95%CI)          | P-value | Beta (95%CI)                  | P-value      |
| n= 102 | Q1                   | Reference             |         | Reference                     |              |
| n= 122 | Q2                   | -0.050 (-0.126,0.025) | 0.189   | -0.028 (-0.108,0.051)         | 0.481        |
| n= 142 | Q3                   | 0.004 (-0.033,0.042)  | 0.826   | 0.011 (-0.026,0.048)          | 0.567        |
| n= 88  | Q4                   | 0.012 (-0.017,0.041)  | 0.423   | 0.016 (-0.014,0.047)          | 0.287        |

Model 1: crude, Model 2: adjusted conception mode (included population only), parity, smoking, folic acid supplement use, alcohol, BMI, age, fetal sex. Quartiles of homocysteine are represented as Q1 2.5-5.2  $\mu\text{mol/L}$ , Q2 5.3-6.0  $\mu\text{mol/L}$ , Q3 6.1-7.2  $\mu\text{mol/L}$ , Q4 7.3-14.9  $\mu\text{mol/L}$ , and Q1 was used as reference category. P-value <0.05 represented in bold.
